# Supplementary material for: Lung Cancer Related Thrombosis (LCART): Focus on Immune Checkpoint Blockade
Source: MDPI journal article supplement (doi:10.3390/cancers16020450), 2024-01-20
Supplement: s1 [file s1]

| Treatment                                             | Rate of VTE | Risk of Bleeding | Pharmacokinetic Implications                                             | GI Implications | Haematological Implications |
|-------------------------------------------------------|-------------|------------------|--------------------------------------------------------------------------|-----------------|-----------------------------|
| <b>Chemotherapy + immunotherapy</b>                   |             |                  |                                                                          |                 |                             |
| Atezolizumab + carboplatin + etoposide                | Low         | Yes              | -                                                                        | X (D, C, S, M)  | A, T                        |
| Atezolizumab + carboplatin + paclitaxel + bevacizumab | 2.6%        | Yes              | P-gps, CYP3A4 <sub>s</sub>                                               | X (D, C, S)     | A, T                        |
| Durvalumab + carboplatin + etoposide                  | Low         | Yes              | -                                                                        | X (D, C, S, M)  | A, T                        |
| Nivolumab + ipilimumab + carboplatin + paclitaxel     | Low         | Yes              | P-gps, CYP3A4 <sub>s</sub>                                               | X (D, C, S)     | A, T                        |
| Nivolumab + ipilimumab + carboplatin + pemetrexed     | Low         | Yes              | -                                                                        | X (D, C, S)     | A, T                        |
| Pembrolizumab + carboplatin + pemetrexed              | Low         | Yes              | -                                                                        | X (D, C, S)     | A, T                        |
| Pembrolizumab + cisplatin + pemetrexed                | Low         | No               | -                                                                        | X (D, C, S)     | A, T                        |
| <b>Chemotherapy</b>                                   |             |                  |                                                                          |                 |                             |
| Carboplatin + gemcitabine                             | 3%          | Yes              | -                                                                        | X (D, S)        | A, T                        |
| Cyclophosphamide + doxorubicin + vincristine          | Low         | Yes              | P-gps, P-gp <sub>ind</sub> , CYP3A4 <sub>s</sub>                         | X (D, S)        | A, T                        |
| Docetaxel                                             | 9%          | Yes              | CYP3A4 <sub>s</sub>                                                      | X (D, S)        | A, T                        |
| Docetaxel + ramucirumab                               | 5%          | Yes              | CYP3A4 <sub>s</sub>                                                      | X (D, S)        | A, T                        |
| Gemcitabine                                           | Low         | No               | -                                                                        | X (D, S)        | A, T                        |
| Irinotecan                                            | Low         | No               | CYP3A4 <sub>s</sub>                                                      | X (D)           | A, T                        |
| Lurbinectedin                                         | Low         | No               | CYP3A4 <sub>s</sub>                                                      | X (D)           | A, T                        |
| Paclitaxel                                            | Low         | Yes              | P-gps, CYP3A4 <sub>s</sub>                                               | X (D, S)        | A, T                        |
| Pemetrexed                                            | Low         | No               | -                                                                        | X (D, S)        | A, T                        |
| Topotecan                                             | Low         | No               | P-gps                                                                    | D, M            | A, T                        |
| Vinorelbine                                           | 3.8%        | No               | P-gps, CYP3A4 <sub>s</sub>                                               | X (D, S)        | A, T                        |
| <b>Targeted Therapy</b>                               |             |                  |                                                                          |                 |                             |
| Afatinib                                              | Low         | Yes              | -                                                                        | X (D, M)        | Epistaxis                   |
| Alectinib                                             | 3%          | No               | CYP3A4 <sub>s</sub> , P-gp <sub>inh</sub>                                | X (D)           | -                           |
| Brigatinib                                            | Low         | No               | CYP3A4 <sub>s</sub> , CYP3A4 <sub>ind</sub> , P-gps, P-gp <sub>inh</sub> | X (D)           | -                           |
| Ceritinib                                             | Low         | No               | CYP3A4 <sub>s</sub> , CYP3A4 <sub>ind</sub> , P-gps                      | X (D)           | A                           |
| Crizotinib                                            | 1-6%        | No               | CYP3A4 <sub>s</sub> , P-gp <sub>inh</sub>                                | X (D)           | A                           |
| Dabrafenib + trametinib                               | 6%          | Yes              | CYP3A4 <sub>s</sub> , CYP3A4 <sub>ind</sub> , P-gps                      | X (D)           | A, T                        |
| Dacomitinib                                           | Low         | No               | P-gps                                                                    | X (D)           | -                           |
| Entrectinib                                           | Low         | No               | CYP3A4 <sub>s</sub> , P-gps                                              | X (D)           | A                           |
| Erlotinib                                             | Low         | Yes              | CYP3A4 <sub>s</sub>                                                      | X (D)           | -                           |
| Gefitinib                                             | Low         | Yes              | CYP3A4 <sub>s</sub>                                                      | X (D)           | -                           |
| Larotrectinib                                         | Low         | No               | CYP3A4 <sub>s</sub> , P-gps                                              | X               | A                           |
| Lorlatinib                                            | Low         | No               | CYP3A4 <sub>s</sub> , P-gp <sub>inh</sub>                                | X (D)           | A                           |
| Osimertinib                                           | 2.1%        | No               | -                                                                        | X (D, M)        | T                           |
| <b>Immunotherapy</b>                                  |             |                  |                                                                          |                 |                             |
| Nivolumab                                             | Low         | No               | -                                                                        | D, C, S         | A, T                        |
| Nivolumab+ipilimumab                                  | Low         | No               | -                                                                        | X (D, C, S)     | A, T                        |
| Pembrolizumab                                         | Low         | No               | -                                                                        | X (D, C, S)     | A, T                        |

**Supplementary Table S1.** GI Implications—X (e.g. Nausea/ Vomiting Colitis/ Diarrhea/ Mucositis), D: Diarrhea; A: anaemia; C: Colitis; T: Thrombocytopenia; S: Stomatitis; M: Mucositis Substrate of CYP3A4 (CYP3A4<sub>s</sub>); Inhibitor of CYP3A4 (CYP3A4<sub>inh</sub>); Inducer of CYP3A4 (CYP3A4<sub>ind</sub>); P-gp inhibitor (P-gp<sub>inh</sub>); P-gp inducer (P-gp<sub>ind</sub>) P-gp substrate (P-gps). Only Strong Inhibitors and inducers noted. Common or Very Common Adverse events included. The clinical relevance of the Pharmacokinetic Implications is not

known. Risk of VTE was noted as low if no or few (<1%) VTE events were recorded in large clinical trials involving the antineoplastic agents or combinations of antineoplastic agents.
